# Supplementary material for: Differences between Human Plasma and Serum Metabolite Profiles
Source: PLoS One. 2011 Jul 8;6(7):e21230. doi: 10.1371/journal.pone.0021230 (PMC3132215; doi:10.1371/journal.pone.0021230)
Supplement: Table S1 — Summary of metabolites in plasma and serum samples. (XLS) [file pone.0021230.s001.xls]

## Sheet: Sheet1
Table S1 Summary of metabolites in plasma and serum samples
Metabolite names	CV of quality controls	Concentrations above LOD(%)	r of repated measurements	Mean ±SD (μM) in plasma *	Mean ±SD (μM) in serum *	Relative mean difference (%) *	r between plasma and serum *	p-value of Wilcoxon test *
C0	0.104463	99.8674	0.854456	42.64 ± 9.67	47.15 ± 11.11	9.94456	0.880428	5.65662e-10
C10	0.116864	95.3581	0.933233	9.88 ± 3.95	10.94 ± 4.72	9.62583	0.955792	1.24474e-08
C10:1	0.0937316	55.1724	0.917084	0.45 ± 0.16	0.48 ± 0.18	5.42423	0.933705	0.000276094
C12	0.120056	94.0318	0.929848	0.28 ± 0.14	0.31 ± 0.16	9.9749	0.972972	1.08896e-08
C12:1	0.139152	17.2414	0.901205	0.14 ± 0.04	0.15 ± 0.05	5.92281	0.878962	0.000612847
C14:1	0.148134	99.8674	0.9303	0.24 ± 0.08	0.27 ± 0.1	14.4223	0.919874	2.30552e-12
C14:2	0.115918	97.2149	0.944523	0.1 ± 0.05	0.11 ± 0.06	11.4409	0.931977	1.33457e-07
C16	0.0929077	99.8674	0.931106	0.36 ± 0.14	0.4 ± 0.16	10.9958	0.902369	1.201e-07
C18	0.160145	99.6021	0.915156	0.19 ± 0.06	0.21 ± 0.07	9.85672	0.867534	4.28572e-06
C18:1	0.0977776	99.8674	0.933982	0.13 ± 0.04	0.16 ± 0.06	13.7621	0.876199	8.43859e-10
C18:2	0.0826326	99.8674	0.89014	0.16 ± 0.05	0.18 ± 0.06	11.1713	0.852623	3.53002e-07
C2	0.0956183	99.8674	0.789392	0.16 ± 0.04	0.18 ± 0.05	10.3563	0.806775	3.29796e-07
C3	0.114417	99.8674	0.88567	0.04 ± 0.01	0.04 ± 0.02	6.99992	0.861645	0.00199941
C4	0.120435	95.4907	0.787274	0.13 ± 0.03	0.15 ± 0.04	14.2647	0.725447	7.69389e-10
C5	0.122499	96.5517	0.81912	0.05 ± 0.01	0.06 ± 0.02	10.1696	0.803099	1.99754e-06
C8	0.0774989	59.1512	0.840883	0.15 ± 0.04	0.17 ± 0.05	10.9796	0.724282	2.73033e-06
C8:1	0.0895359	91.6446	0.818924	0.06 ± 0.02	0.06 ± 0.02	2.94692	0.662678	0.289954
Arg	0.0829219	99.8674	0.534968	88.51 ± 17.48	146.67 ± 20.35	49.993	0.500037	2.54765e-15
Gln	0.111273	100	0.520248	589.99 ± 83.97	646.12 ± 89.1	9.05832	0.471533	7.5517e-07
Gly	0.0955648	100	0.857003	252.17 ± 75.49	316.6 ± 73.93	24.0396	0.819066	1.26395e-14
His	0.127863	99.8674	0.461259	91.58 ± 14.11	103.68 ± 16.54	12.2094	0.588819	3.82461e-10
Met	0.113437	99.8674	0.738932	32.23 ± 6.4	37.62 ± 7.28	15.3355	0.670426	1.94147e-11
Orn	0.103727	99.8674	0.752997	79.28 ± 20.7	81.09 ± 18.26	2.85398	0.695786	0.23845
Phe	0.163841	99.8674	0.618316	52.77 ± 10.03	70.68 ± 14.52	28.4585	0.575342	6.96904e-15
Pro	0.0962295	100	0.907813	208.4 ± 62.39	232.93 ± 63.91	11.3156	0.888942	1.51587e-09
Ser	0.150686	99.8674	0.724555	89.93 ± 22.13	128.48 ± 26.92	35.879	0.774162	2.54765e-15
Thr	0.113443	99.8674	0.783295	98.35 ± 27.23	108.66 ± 27.05	10.4815	0.838719	1.50399e-07
Trp	0.098377	99.8674	0.649782	76.47 ± 10.12	88.96 ± 12.78	14.8253	0.557986	7.68355e-13
Tyr	0.142598	99.8674	0.705947	78.98 ± 17.57	88.12 ± 18.4	10.9707	0.708493	1.64501e-07
Val	0.105399	100	0.740933	286.24 ± 52.04	309.77 ± 60.07	7.5425	0.660416	3.87048e-05
xLeu	0.103722	100	0.782883	233.81 ± 50	264.22 ± 56.52	11.9419	0.67663	2.87999e-08
PC aa C24:0	0.229866	62.7321	0.295822	0.65 ± 0.09	0.67 ± 0.1	3.72238	0.608534	0.00685681
PC aa C28:1	0.0909655	99.8674	0.884687	3.28 ± 0.95	3.66 ± 1.03	10.8204	0.856008	9.0973e-08
PC aa C30:0	0.105732	99.8674	0.947738	5.26 ± 1.98	5.75 ± 2.23	8.1799	0.920532	8.61219e-06
PC aa C32:0	0.0557301	99.8674	0.851193	15.23 ± 4.32	17.19 ± 4.51	12.0504	0.848623	2.19911e-09
PC aa C32:1	0.112878	99.8674	0.965402	20.17 ± 12.61	22.36 ± 13.43	9.87421	0.954994	1.17735e-07
PC aa C32:2	0.212299	99.8674	0.929539	4.65 ± 1.96	5.1 ± 2.15	8.69924	0.913132	5.17495e-05
PC aa C32:3	0.0913352	99.8674	0.854202	0.5 ± 0.15	0.56 ± 0.16	12.5759	0.824546	1.47998e-08
PC aa C34:1	0.0479007	100	0.839377	234.94 ± 79.75	265.48 ± 83.75	12.0552	0.895872	5.17928e-10
PC aa C34:2	0.134605	100	0.636707	395.28 ± 112.48	440.52 ± 105.24	11.1712	0.850276	1.10393e-08
PC aa C34:3	0.0615957	100	0.914259	17.03 ± 5.78	19.1 ± 6.61	10.9739	0.886483	5.08113e-08
PC aa C34:4	0.101269	99.8674	0.942224	2.31 ± 0.91	2.59 ± 1.02	11.0988	0.919042	2.63831e-08
PC aa C36:0	0.130411	99.8674	0.769761	3.02 ± 0.84	3.39 ± 0.96	11.3098	0.86162	1.81486e-08
PC aa C36:1	0.120839	99.8674	0.888143	51.78 ± 16.77	58.86 ± 18.19	12.4597	0.867336	2.20116e-09
PC aa C36:2	0.0620216	100	0.837953	247.4 ± 70.35	276.48 ± 68.83	11.3064	0.846531	1.01531e-08
PC aa C36:3	0.0552831	100	0.890238	143.8 ± 50.91	162.57 ± 49.61	12.4578	0.889117	2.10168e-09
PC aa C36:4	0.0701606	100	0.822257	206.61 ± 57.88	232.18 ± 57.54	11.8288	0.850945	2.7157e-09
PC aa C36:5	0.0766815	100	0.971125	29.73 ± 16.77	33.85 ± 19.19	11.6772	0.964583	2.30208e-09
PC aa C36:6	0.157871	99.8674	0.946988	1.15 ± 0.49	1.27 ± 0.56	9.29797	0.927268	3.05183e-06
PC aa C38:0	0.106328	99.8674	0.842703	3.09 ± 0.84	3.52 ± 0.98	12.4409	0.878936	2.03528e-10
PC aa C38:1	0.215396	99.7347	0.520036	0.61 ± 0.61	0.79 ± 0.78	25.3792	0.888808	3.95802e-05
PC aa C38:3	0.0737665	100	0.918018	52.57 ± 18.23	58.69 ± 18.15	11.2455	0.884137	2.92573e-08
PC aa C38:4	0.0619794	100	0.888712	111.2 ± 31.75	123.59 ± 32.51	10.6994	0.856105	2.53016e-08
PC aa C38:5	0.0685749	100	0.910573	58.75 ± 17.61	66.37 ± 20.34	11.6204	0.878747	1.24172e-09
PC aa C38:6	0.0692276	100	0.904449	82.47 ± 26.46	92.59 ± 28.9	11.4306	0.901292	3.81586e-09
PC aa C40:1	0.17728	15.3846	0.735034	0.41 ± 0.09	0.45 ± 0.1	7.70245	0.790148	3.08482e-06
PC aa C40:4	0.0733422	99.8674	0.913115	3.68 ± 1.31	4.04 ± 1.29	9.43678	0.879693	1.42225e-06
PC aa C40:5	0.0644057	99.8674	0.939833	11.18 ± 3.75	12.41 ± 4.16	10.1196	0.892422	1.64358e-07
PC aa C40:6	0.069686	100	0.929441	27.39 ± 9.51	30.27 ± 10.13	9.99984	0.897747	2.24547e-07
PC aa C42:0	0.167327	99.8674	0.910826	0.53 ± 0.17	0.58 ± 0.2	9.26039	0.895358	1.88911e-06
PC aa C42:1	0.192529	99.8674	0.83101	0.26 ± 0.07	0.29 ± 0.09	10.0458	0.837302	8.80447e-07
PC aa C42:2	0.168903	99.8674	0.839381	0.19 ± 0.06	0.21 ± 0.08	8.76329	0.844445	0.000190418
PC aa C42:5	0.209167	100	0.873785	0.37 ± 0.12	0.41 ± 0.14	9.03107	0.873183	8.64391e-06
PC aa C42:6	0.138836	62.069	0.851679	0.56 ± 0.13	0.58 ± 0.13	3.29484	0.803927	0.0412657
PC ae C30:0	0.228896	99.7347	0.866634	0.41 ± 0.14	0.46 ± 0.16	9.34983	0.884464	4.2411e-06
PC ae C30:2	0.201465	87.4005	0.661027	0.11 ± 0.03	0.12 ± 0.04	8.463	0.647957	0.00348046
PC ae C32:1	0.072854	100	0.860435	2.97 ± 0.79	3.37 ± 0.93	12.2692	0.823797	4.34187e-09
PC ae C32:2	0.132426	99.8674	0.856186	0.71 ± 0.19	0.8 ± 0.22	11.5207	0.823663	3.93843e-08
PC ae C34:0	0.0838538	99.8674	0.908206	1.72 ± 0.53	1.99 ± 0.62	13.7586	0.875201	3.36187e-10
PC ae C34:1	0.0598661	99.8674	0.872029	10.53 ± 2.54	11.96 ± 3.08	12.0444	0.817585	4.26547e-09
PC ae C34:2	0.0509788	100	0.891639	12.23 ± 3.42	14.02 ± 4.01	13.2412	0.836753	1.37445e-09
PC ae C34:3	0.0539865	99.8674	0.917207	8.23 ± 2.73	9.4 ± 3.08	13.055	0.892727	5.57645e-10
PC ae C36:1	0.0988167	99.8674	0.871972	8.24 ± 1.98	9.36 ± 2.59	11.6264	0.82589	1.73427e-08
PC ae C36:2	0.0698185	99.8674	0.908996	14.62 ± 4.17	16.52 ± 4.65	12.0503	0.860824	7.62694e-09
PC ae C36:3	0.0614325	99.8674	0.878627	8.08 ± 2.05	9.19 ± 2.39	12.4722	0.82334	1.7792e-09
PC ae C36:4	0.0571619	100	0.850051	20.1 ± 4.78	22.98 ± 5.56	13.1047	0.793673	1.18934e-09
PC ae C36:5	0.0560455	99.8674	0.878744	13.92 ± 3.5	15.99 ± 4.21	13.4738	0.838429	2.50061e-10
PC ae C38:0	0.2249	99.8674	0.84666	1.99 ± 0.7	2.27 ± 0.8	12.814	0.915268	8.53683e-10
PC ae C38:1	0.248152	99.6021	0.26649	0.61 ± 0.22	0.68 ± 0.29	6.27848	0.487316	0.040376
PC ae C38:2	0.144981	99.8674	0.836784	1.86 ± 0.51	2.16 ± 0.63	13.94	0.780383	6.61942e-09
PC ae C38:3	0.0954126	100	0.871333	3.88 ± 0.96	4.37 ± 1.13	11.4664	0.822378	9.66255e-09
PC ae C38:4	0.0647456	99.8674	0.811475	14.81 ± 3.07	16.72 ± 3.41	11.9911	0.745332	3.16235e-09
PC ae C38:5	0.0556836	100	0.806541	18.63 ± 3.68	21.24 ± 4.37	12.7791	0.750044	4.47622e-10
PC ae C38:6	0.0658563	100	0.864977	7.95 ± 1.94	9.07 ± 2.35	12.796	0.842513	6.63118e-10
PC ae C40:0	0.102659	2.25464	0.761574	9.33 ± 1.74	10.02 ± 1.93	6.85535	0.886035	1.01682e-08
PC ae C40:1	0.249635	99.8674	0.664303	1.41 ± 0.31	1.56 ± 0.41	8.80396	0.801755	1.62901e-06
PC ae C40:2	0.178471	99.8674	0.877449	1.87 ± 0.49	2.1 ± 0.59	10.7043	0.805598	6.16377e-07
PC ae C40:3	0.218962	100	0.806328	1.03 ± 0.25	1.19 ± 0.28	13.8989	0.809439	4.14595e-11
PC ae C40:4	0.149834	99.8674	0.819273	2.35 ± 0.48	2.66 ± 0.58	12.057	0.753018	2.77495e-09
PC ae C40:5	0.0776261	99.8674	0.843131	3.28 ± 0.62	3.66 ± 0.79	10.2711	0.737643	9.92871e-08
PC ae C40:6	0.0651383	100	0.892047	4.89 ± 1.28	5.51 ± 1.52	11.2605	0.860503	7.79567e-09
PC ae C42:1	0.141404	99.8674	0.657519	0.34 ± 0.08	0.36 ± 0.09	5.00644	0.731167	0.0063345
PC ae C42:2	0.186978	99.8674	0.818178	0.59 ± 0.15	0.65 ± 0.19	9.18018	0.845052	1.11898e-06
PC ae C42:3	0.242178	99.8674	0.750146	0.75 ± 0.16	0.84 ± 0.23	9.31813	0.777892	4.51899e-06
PC ae C42:4	0.147777	100	0.874219	0.82 ± 0.21	0.91 ± 0.26	9.14087	0.799738	7.34531e-06
PC ae C42:5	0.16334	99.7347	0.852476	1.99 ± 0.46	2.21 ± 0.54	10.1555	0.848133	5.65178e-09
PC ae C44:3	0.145876	99.8674	0.620319	0.11 ± 0.03	0.12 ± 0.03	5.80799	0.636343	0.013703
PC ae C44:4	0.181613	99.8674	0.852659	0.39 ± 0.11	0.43 ± 0.14	8.43007	0.818972	6.489e-05
PC ae C44:5	0.115204	99.8674	0.900671	1.74 ± 0.48	1.93 ± 0.62	8.87654	0.883313	3.53952e-07
PC ae C44:6	0.0755748	99.8674	0.908219	1.14 ± 0.31	1.28 ± 0.37	10.4212	0.856924	7.33725e-08
lysoPC a C14:0	0.244007	7.55968	0.714258	3.87 ± 1.24	4.28 ± 1.34	10.6252	0.928086	1.00315e-09
lysoPC a C16:0	0.0740987	100	0.76511	101.23 ± 19.61	130.59 ± 25.12	25.2308	0.627667	8.09334e-15
lysoPC a C16:1	0.0587387	99.8674	0.924433	3.38 ± 1.41	4.13 ± 1.7	19.9593	0.929339	3.27765e-13
lysoPC a C17:0	0.134309	99.8674	0.874387	1.86 ± 0.54	2.38 ± 0.73	23.8302	0.825152	7.18105e-14
lysoPC a C18:0	0.150168	100	0.766035	29.81 ± 6.43	39.2 ± 8.01	27.2994	0.708294	3.40923e-15
lysoPC a C18:1	0.113513	99.8674	0.894617	21.09 ± 6.29	26.35 ± 7.59	22.077	0.867518	3.63512e-14
lysoPC a C18:2	0.0724233	99.8674	0.924092	26.13 ± 8.45	30.01 ± 9.82	13.6818	0.891652	2.78259e-10
lysoPC a C20:3	0.104424	99.8674	0.891656	2.5 ± 0.78	2.9 ± 0.98	13.6174	0.905612	9.81329e-11
lysoPC a C20:4	0.0972131	100	0.869682	6.64 ± 1.9	8.04 ± 2.51	18.3092	0.885548	1.14001e-12
lysoPC a C28:0	0.247392	24.1379	0.21234	0.31 ± 0.08	0.34 ± 0.09	10.336	0.57527	9.40023e-05
SM (OH) C14:1	0.0865452	99.8674	0.869872	6.51 ± 1.84	7.03 ± 2.09	7.22853	0.839717	0.000531903
SM (OH) C16:1	0.0983781	99.8674	0.865578	3.65 ± 1.02	4 ± 1.19	8.50606	0.80741	0.000125972
SM (OH) C22:1	0.142504	100	0.862796	12.93 ± 3.82	14.1 ± 4.93	7.15412	0.836854	0.00103693
SM (OH) C22:2	0.158549	100	0.863374	10.61 ± 3.1	11.59 ± 3.85	7.69481	0.820793	0.000567989
SM (OH) C24:1	0.197803	100	0.864752	1.25 ± 0.44	1.3 ± 0.48	3.7617	0.807992	0.105049
SM C16:0	0.0861915	100	0.772783	105.82 ± 19.62	115.47 ± 25.6	7.91143	0.653005	0.000145346
SM C16:1	0.0762456	100	0.799483	16.32 ± 3.36	17.74 ± 4.24	7.69076	0.723752	0.000205881
SM C18:0	0.116187	100	0.77795	23.11 ± 5.86	25.57 ± 7.21	9.26755	0.756376	5.56806e-05
SM C18:1	0.0864708	100	0.846301	11.92 ± 3.13	13.1 ± 3.64	9.15309	0.772094	7.95023e-05
SM C24:0	0.10816	99.8674	0.820762	19.9 ± 4.51	21.37 ± 6.03	5.85387	0.746508	0.00484399
SM C24:1	0.121973	100	0.775865	47.75 ± 12.04	52.22 ± 14.54	8.11726	0.747373	0.000401772
H1	0.0959749	99.8674	0.863985	5586.66 ± 1412.33	6009.7 ± 1567.69	6.98702	0.884082	1.76605e-06
The metabolites below are excluded for analysis
C10:2	0.200791	72.5464	0.335587	0.04 ± 0.01	0.05 ± 0.01	11.1	0.042	9.19692e-08
C12-DC	0.139269	0	0.0260304	0.06 ± 0.02	0.06 ± 0.02	-1.9	0.0576265	0.000228955
C14	0.112846	71.2202	0.373188	0.06 ± 0.01	0.07 ± 0.02	-1.8	0.0573494	2.11986e-07
C14:1-OH	0.119921	72.5464	0.476713	0.02 ± 0	0.02 ± 0.01	-11.8	0.0166024	1.59815e-05
C14:2-OH	0.138224	32.8912	0.188906	0.01 ± 0	0.01 ± 0	8	0.0105422	9.21472e-06
C16-OH	0.230185	2.65252	0.450546	0.01 ± 0	0.01 ± 0	10.5	0.00780723	0.03733
C16:1	0.144979	2.51989	0.818555	0.05 ± 0.01	0.05 ± 0.01	9	0.0460602	0.0172157
C16:1-OH	0.134179	5.17241	0.313823	0.01 ± 0.01	0.01 ± 0.01	0	0.0107952	0.00013586
C16:2	0.165635	74.1379	0.388437	0.01 ± 0	0.01 ± 0	-13.3	0.00979518	0.0313766
C16:2-OH	0.184468	9.15119	0.225532	0.01 ± 0	0.01 ± 0	-7.4	0.0119518	0.354873
C18:1-OH	0.199163	0	0.27451	0.01 ± 0	0.01 ± 0	-30.8	0.011012	0.0113446
C3-DC (C4-OH)	0.212361	27.9841	0.571562	0.06 ± 0.03	0.06 ± 0.03	-19.3	0.0560602	1.57535e-07
C5-OH (C3-DC-M)	0.248016	48.0106	0.0622838	0.02 ± 0	0.02 ± 0	-21.7	0.0155422	0.000354176
C3:OH	0.419649	0.132626	-0.0812926	0.01 ± 0	0.01 ± 0	19	0.0076506	0.038256
C3:1	0.362329	0	0.317661	0.02 ± 0.01	0.02 ± 0.01	-10.5	0.0175422	2.77749e-05
C4:1	0.19958	19.6286	0.519548	0.02 ± 0.01	0.02 ± 0.01	0	0.0181084	6.1032e-06
C6 (C4:1-DC)	0.199796	80.2387	0.409575	0.03 ± 0.01	0.03 ± 0.01	0	0.0293976	0.129899
C5-DC (C6-OH)	0.192948	64.191	0.208228	0.03 ± 0.01	0.04 ± 0.01	-5.1	0.0333855	0.00157823
C5-M-DC	0.327035	1.72414	0.361227	0.04 ± 0.01	0.04 ± 0.02	4.1	0.0352048	6.44308e-06
C5:1	0.214026	0.397878	0.305878	0.01 ± 0	0.01 ± 0	7.1	0.0136145	0.00264588
C5:1-DC	0.316241	24.9337	0.895317	0.08 ± 0.03	0.09 ± 0.04	-8.7	0.0846506	4.91974e-05
C6:1	0.217295	0	0.338194	0.02 ± 0.01	0.02 ± 0.01	0	0.0183735	0.983983
C7-DC	0.122575	62.069	0.686483	0.04 ± 0.01	0.05 ± 0.02	4.9	0.0432048	7.08261e-10
C9	0.160202	86.6048	0.627031	0.06 ± 0.02	0.06 ± 0.03	1.7	0.0609518	0.434244
PC aa C26:0	0.211378	6.6313	0.232766	0.09 ± 0.02	0.1 ± 0.03	15.4	0.090747	0.197893
PC aa C30:2	0.554722	73.8727	-0.0664599	0.01 ± 0.04	0.03 ± 0.07	200	0.0137711	0.17848
PC aa C40:2	0.257086	99.8674	0.502713	0.33 ± 0.09	0.37 ± 0.1	-26.2	0.334398	3.84207e-05
PC aa C40:3	0.274264	99.8674	0.668763	0.56 ± 0.15	0.63 ± 0.18	-10.9	0.561361	1.34908e-08
PC aa C42:4	0.254773	99.8674	0.516462	0.19 ± 0.04	0.21 ± 0.04	-24.6	0.187916	3.02236e-06
PC ae C30:1	0.406001	69.8939	0.330498	0.06 ± 0.08	0.07 ± 0.11	-191.1	0.0613373	0.802373
PC ae C36:0	0.336128	99.8674	0.760168	0.88 ± 0.24	1.03 ± 0.32	-23.7	0.884747	6.46554e-10
PC ae C42:0	0.323431	18.0371	0.504488	0.49 ± 0.09	0.53 ± 0.11	-7.8	0.488193	2.98426e-06
lysoPC a C24:0	0.208454	23.6074	0.132961	0.21 ± 0.05	0.22 ± 0.05	13.7	0.214145	0.120341
lysoPC a C26:0	0.265471	30.9019	-0.0644739	0.26 ± 0.08	0.29 ± 0.08	-2.3	0.257831	0.0015436
lysoPC a C26:1	0.100804	0	0.0732585	1.98 ± 0.57	1.99 ± 0.54	2.1	0.289157	0.843429
lysoPC a C28:1	0.259003	98.4085	0.638998	0.44 ± 0.15	0.49 ± 0.17	7.5	0.44059	5.43191e-05
lysoPC a C6:0	0.315329	29.9735	-0.0757611	0.01 ± 0.01	0.01 ± 0.01	6.5	0.013759	0.791994
SM C20:2	0.307685	99.8674	0.439735	0.27 ± 0.13	0.31 ± 0.17	-2.4	0.26547	0.00207537
SM C22:3	0.769328	88.1963	0.088344	0.01 ± 0.03	0.03 ± 0.08	-3.85	0.010759	0.171077
SM C26:0	0.521317	100	0.625368	0.19 ± 0.07	0.2 ± 0.08	80.9	0.186	0.111761
SM C26:1	0.402936	99.8674	0.804714	0.41 ± 0.14	0.43 ± 0.17	15.2	0.414783	0.321179
The abbreviations of 163 metabolite name are shown in the first column. The next three columns list the values of coefficient of variance (CV) of quality controls, percentage of individuals above limit of detection (LOD), and correlation coefficient (r) of repeated measurements, respectively, for each metabolite. The following two columns exhibit the mean concentration (μM) and standard deviation…
*These values refer to the 83 individuals whose plasma and serum samples were measued in the same plates
